# Supplementary material for: The Ability of Acid-Based Natural Deep Eutectic Solvents to Co-Extract Elements from the Roots of Glycyrrhiza glabra L. and Associated Health Risks
Source: MDPI journal article supplement (doi:10.3390/molecules27227690), 2022-11-09
Supplement: s1 [file s1]

## The ability of acid-based natural deep eutectic solvents for co-extraction of elements from roots of *Glycyrrhiza glabra* L and associated health risks

Alexander N. Shikov <sup>1,\*</sup>, Veronika A. Shikova <sup>1</sup>, Anastasia O. Waley <sup>1</sup>, Marina A. Burakova <sup>1</sup>, Elena V. Flisyuk <sup>1</sup>, Andrew K. Whaley <sup>1</sup>, Inna I. Terninko <sup>1</sup>, Irina V. Gravel <sup>2</sup> and Olga N. Pozharitskaya <sup>3</sup>

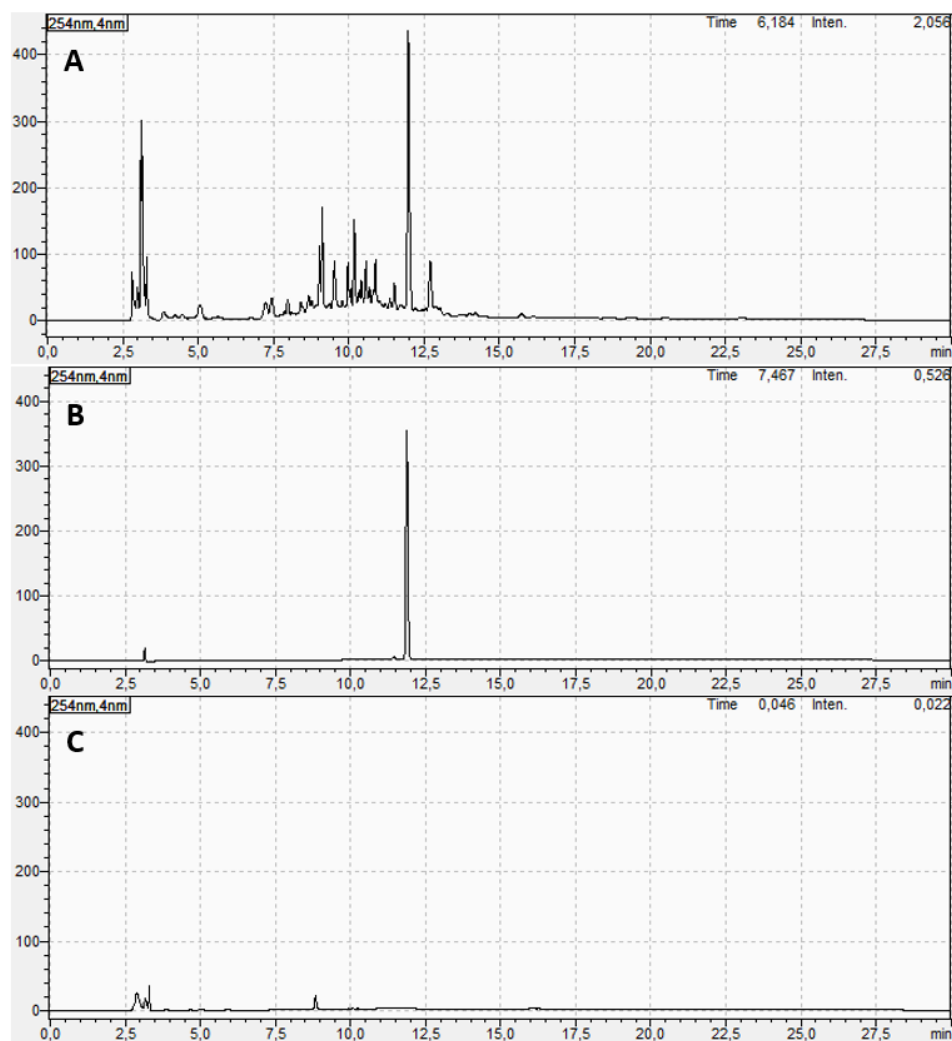

**Figure S1.** The typical chromatogram of NADES extract of licorice (**NADES5**) (A), glycyrrhizic acid 0.2 mg/mL (B), and pure NADES (C).
